# Supplementary material
Source: PubMed Central journal article supplement (PMC3838117)
Supplement: JVI.01602-13_zjv999098328so1.pdf [file JVI.01602-13_zjv999098328so1.pdf]

## **SUPPLEMENTARY TABLES**

*Supplementary Table 1. Primer sequences used in this study.*

| <i>Name</i>            | <i>Sequence (5'-3')</i>         | <i>Type</i>     |
|------------------------|---------------------------------|-----------------|
| sJFH_8202 <sup>a</sup> | GTG GAG TAT CTC TTG AAA GCA TGG | Outer sense     |
| sJFH_8256              | TAT GAT ACC CGA TGC TTC GAC TCA | Inner sense     |
| sJFH_9010              | ATT GAG AGG TTA CAC GGG CTT GA  | Inner antisense |
| sJFH_9049              | ACA TAC TCT CAC CAC GAA CTG AC  | Outer antisense |

<sup>a</sup> *Primer numbers refer to the positioning on the genome using absolute numbering of nucleotides of the reference strain H77.*

*Supplementary Table 2. Detection limit of nRT-PCR as determined by serial endpoint dilutions of JFH-1 transcripts.*

| <i>RNA copies/ reaction</i> | <i>No. Positive results/<br/>Total PCRs</i> |
|-----------------------------|---------------------------------------------|
| 6                           | 8/8                                         |
| 3                           | 6/8                                         |
| 0.6                         | 2/8                                         |
